# Supplementary material for: Species-Specific Relationships between Water Transparency and Male Coloration within and between Two Closely Related Lake Victoria Cichlid Species
Source: PubMed Central journal article supplement (PMC3408676; doi:10.1155/2012/161306), 2012-07-19
Supplement: 161306.f1.pdf [file 161306.f1.pdf]

## Supplementary Information

*Species-specific relationships between water transparency and male coloration within and between two closely related Lake Victoria cichlid species*

Ruth F. Castillo Cajas, Oliver M. Selz, Erwin A. P. Ripmeester, Ole Seehausen and Martine E. Maan

| Supplementary Table S1: Repeatability for irradiance data: orange ratio |            |              |      |            |              |       |            |              |      |            |              |       |            |              |       |
|-------------------------------------------------------------------------|------------|--------------|------|------------|--------------|-------|------------|--------------|------|------------|--------------|-------|------------|--------------|-------|
| depth                                                                   | Luanso     |              |      | Kissenda   |              |       | Python     |              |      | Makobe     |              |       | Ruti       |              |       |
|                                                                         | N<br>dates | N<br>spectra | r    | N<br>dates | N<br>spectra | r     | N<br>dates | N<br>spectra | r    | N<br>dates | N<br>spectra | r     | N<br>dates | N<br>spectra | r     |
| 0.5                                                                     | 2          | 4            | 0.96 | 3          | 6            | 0.88  | 4          | 9            | 0.99 | 3          | 5            | 0.70  | 3          | 5            | 0.96  |
| 1                                                                       | 2          | 4            | 0.71 | 3          | 6            | 0.59  | 4          | 8            | 1.00 | 4          | 9            | 0.82  | 3          | 5            | 0.87  |
| 1.5                                                                     | 2          | 4            | 0.98 | 3          | 6            | 0.67  | 4          | 10           | 1.00 | 3          | 6            | 0.31  | 3          | 8            | -0.67 |
| 2                                                                       | 2          | 6            | 0.71 | 3          | 8            | 0.67  | 4          | 10           | 1.00 | 3          | 7            | -0.16 | 3          | 6            | 0.77  |
| 2.5                                                                     | 2          | 4            | 0.99 | 3          | 6            | 0.94  | 4          | 10           | 1.00 | 3          | 10           | 0.59  | 3          | 6            | 0.95  |
| 3                                                                       | 2          | 8            | 0.93 | 3          | 8            | 0.93  | 4          | 10           | 1.00 | 4          | 11           | 0.92  | 3          | 6            | 0.99  |
| 3.5                                                                     | 2          | 7            | 0.65 | 3          | 10           | 0.91  | 4          | 15           | 1.00 | 2          | 5            | 0.96  | 3          | 5            | 0.82  |
| 4                                                                       |            |              |      | 3          | 6            | 0.96  | 4          | 8            | 1.00 | 4          | 13           | 0.81  | 3          | 8            | 0.99  |
| 4.5                                                                     |            |              |      | 3          | 8            | 0.97  | 4          | 8            | 1.00 | 2          | 5            | 0.98  | 3          | 6            | 1.00  |
| 5                                                                       |            |              |      | 3          | 6            | 1.00  | 4          | 8            | 1.00 | 4          | 9            | 0.98  | 3          | 6            | 1.00  |
| 6                                                                       |            |              |      | 2          | 6            | -0.28 | 3          | 6            | 1.00 | 4          | 12           | 0.86  | 3          | 8            | 1.00  |
| 7                                                                       |            |              |      |            |              |       |            |              |      | 4          | 11           | 0.96  | 3          | 6            | 1.00  |
| 8                                                                       |            |              |      |            |              |       |            |              |      | 4          | 11           | 0.37  | 3          | 8            | 0.68  |
| 9                                                                       |            |              |      |            |              |       |            |              |      | 4          | 12           | 0.99  | 3          | 6            | 1.00  |
| 10                                                                      |            |              |      |            |              |       |            |              |      | 4          | 16           | -0.29 | 2          | 8            | 0.97  |
| 11                                                                      |            |              |      |            |              |       |            |              |      | 4          | 9            | 1.00  | 2          | 5            | 1.00  |
| 12                                                                      |            |              |      |            |              |       |            |              |      | 3          | 6            | 1.00  | 2          | 4            | 1.00  |

| Supplementary Table S2: Repeatability for reflectance data: chroma |             |                    |      |         |                      |      |         |                    |      |         |                      |      |         |
|--------------------------------------------------------------------|-------------|--------------------|------|---------|----------------------|------|---------|--------------------|------|---------|----------------------|------|---------|
|                                                                    |             | light source: lamp |      |         |                      |      |         | light source: sun  |      |         |                      |      |         |
|                                                                    |             | <i>P. nyererei</i> |      |         | <i>P. pundamilia</i> |      |         | <i>P. nyererei</i> |      |         | <i>P. pundamilia</i> |      |         |
|                                                                    |             | r                  | N    | N       | r                    | N    | N       | r                  | N    | N       | r                    | N    | N       |
|                                                                    |             |                    | fish | spectra |                      | fish | spectra |                    | fish | spectra |                      | fish | spectra |
| dorsum                                                             | Kissenda    | NA                 | 1    | 2       | NA                   | 1    | 2       | 0.99               | 5    | 10      | 0.63                 | 7    | 15      |
|                                                                    | Python      | 0.91               | 9    | 21      | 0.63                 | 5    | 13      | 0.94               | 7    | 13      | 0.71                 | 5    | 10      |
|                                                                    | Makobe      | 0.33               | 9    | 22      | 0.61                 | 5    | 10      | 0.82               | 9    | 20      | 0.85                 | 4    | 8       |
|                                                                    | Ruti        | 0.90               | 11   | 24      | 0.57                 | 8    | 16      | 0.65               | 6    | 15      | NA                   | 1    | 2       |
|                                                                    | All islands | 0.86               | 30   | 69      | 0.64                 | 19   | 41      | 0.90               | 27   | 58      | 0.66                 | 17   | 35      |
| dorsal fin                                                         | Kissenda    | NA                 | 1    | 2       | NA                   | 1    | 2       | 0.97               | 5    | 9       | 0.32                 | 7    | 14      |
|                                                                    | Python      | 0.54               | 9    | 20      | 0.76                 | 4    | 12      | 0.74               | 7    | 13      | 0.68                 | 5    | 10      |
|                                                                    | Makobe      | 0.96               | 9    | 18      | 0.87                 | 5    | 12      | 0.85               | 7    | 15      | 0.64                 | 5    | 9       |
|                                                                    | Ruti        | 0.95               | 11   | 22      | 0.98                 | 8    | 16      | 0.93               | 6    | 14      | NA                   | 1    | 2       |
|                                                                    | All islands | 0.94               | 30   | 62      | 0.92                 | 18   | 42      | 0.95               | 25   | 51      | 0.58                 | 18   | 35      |
| dorsal fin lappets                                                 | Kissenda    | NA                 | 1    | 2       | NA                   | 1    | 2       | 0.83               | 5    | 9       | 0.60                 | 7    | 13      |
|                                                                    | Python      | 0.91               | 8    | 16      | 0.90                 | 4    | 9       | 0.81               | 7    | 14      | 0.99                 | 5    | 9       |
|                                                                    | Makobe      | 0.88               | 3    | 5       | 0.94                 | 5    | 10      | 0.97               | 8    | 18      | 0.92                 | 5    | 10      |
|                                                                    | Ruti        | NA                 | 1    | 2       | 0.81                 | 8    | 17      | 0.86               | 6    | 11      | NA                   | 1    | 2       |
|                                                                    | All islands | 0.91               | 13   | 25      | 0.86                 | 18   | 38      | 0.93               | 26   | 52      | 0.82                 | 18   | 34      |
| anal fin spot                                                      | Kissenda    | NA                 | 1    | 4       | NA                   | 1    | 1       | -0.10              | 5    | 10      | 0.64                 | 7    | 14      |
|                                                                    | Python      | 0.94               | 8    | 14      | 0.41                 | 4    | 8       | 0.90               | 7    | 12      | 0.36                 | 5    | 10      |
|                                                                    | Makobe      | 0.89               | 10   | 19      | 0.74                 | 5    | 14      | 0.93               | 9    | 19      | 0.85                 | 5    | 10      |
|                                                                    | Ruti        | 0.88               | 11   | 21      | 0.95                 | 8    | 16      | 0.75               | 6    | 14      | NA                   | 1    | 2       |
|                                                                    | All islands | 0.89               | 30   | 58      | 0.78                 | 18   | 39      | 0.79               | 27   | 55      | 0.82                 | 18   | 36      |
| flank                                                              | Kissenda    | NA                 | 1    | 2       | NA                   | 1    | 1       | 0.88               | 5    | 11      | 0.49                 | 7    | 14      |
|                                                                    | Python      | 0.96               | 9    | 19      | 0.37                 | 5    | 19      | 0.93               | 7    | 16      | 0.99                 | 5    | 10      |
|                                                                    | Makobe      | 0.82               | 10   | 20      | 0.64                 | 5    | 12      | 0.93               | 9    | 21      | 0.59                 | 5    | 12      |
|                                                                    | Ruti        | 0.92               | 11   | 21      | 0.77                 | 8    | 16      | 0.79               | 6    | 16      | NA                   | 1    | 2       |
|                                                                    | All islands | 0.92               | 31   | 62      | 0.71                 | 19   | 48      | 0.92               | 27   | 64      | 0.73                 | 18   | 38      |

| Supplementary Table S3: Repeatability for reflectance data: $\lambda P_{50}$ |             |                    |         |      |                      |      |         |                    |         |      |                      |      |         |
|------------------------------------------------------------------------------|-------------|--------------------|---------|------|----------------------|------|---------|--------------------|---------|------|----------------------|------|---------|
|                                                                              |             | light source: lamp |         |      |                      |      |         | light source: sun  |         |      |                      |      |         |
|                                                                              |             | <i>P. nyererei</i> |         |      | <i>P. pundamilia</i> |      |         | <i>P. nyererei</i> |         |      | <i>P. pundamilia</i> |      |         |
|                                                                              |             | r                  | N       | N    | r                    | N    | N       | r                  | N       | N    | r                    | N    | N       |
|                                                                              |             | fish               | spectra | fish | spectra              | fish | spectra | fish               | spectra | fish | spectra              | fish | spectra |
| dorsum                                                                       | Kissenda    | NA                 | 1       | 2    | NA                   | 1    | 2       | 0.99               | 5       | 10   | 0.76                 | 7    | 15      |
|                                                                              | Python      | 0.95               | 9       | 21   | 0.92                 | 5    | 13      | 0.91               | 7       | 13   | 0.18                 | 5    | 10      |
|                                                                              | Makobe      | 0.39               | 9       | 22   | 0.73                 | 5    | 10      | 0.91               | 9       | 20   | 0.93                 | 4    | 8       |
|                                                                              | Ruti        | 0.98               | 11      | 24   | 0.90                 | 8    | 16      | 0.74               | 6       | 15   | NA                   | 1    | 2       |
|                                                                              | All islands | 0.90               | 30      | 69   | 0.85                 | 19   | 41      | 0.94               | 27      | 58   | 0.75                 | 17   | 35      |
| dorsal fin                                                                   | Kissenda    | NA                 | 1       | 2    | NA                   | 1    | 2       | 0.73               | 5       | 9    | 0.43                 | 7    | 14      |
|                                                                              | Python      | 0.87               | 9       | 20   | 0.78                 | 4    | 12      | 0.72               | 7       | 13   | 0.61                 | 5    | 10      |
|                                                                              | Makobe      | 0.94               | 9       | 18   | 0.89                 | 5    | 12      | 0.85               | 7       | 15   | 0.86                 | 5    | 9       |
|                                                                              | Ruti        | 0.92               | 11      | 22   | 0.99                 | 8    | 16      | 0.93               | 6       | 14   | NA                   | 1    | 2       |
|                                                                              | All islands | 0.97               | 30      | 62   | 0.91                 | 18   | 42      | 0.93               | 25      | 51   | 0.71                 | 18   | 35      |
| dorsal fin<br>lappets                                                        | Kissenda    | NA                 | 1       | 2    | NA                   | 1    | 2       | 0.51               | 5       | 9    | 0.55                 | 7    | 13      |
|                                                                              | Python      | 0.85               | 8       | 16   | 0.85                 | 4    | 9       | 0.81               | 7       | 14   | 0.98                 | 5    | 9       |
|                                                                              | Makobe      | 0.93               | 3       | 5    | 0.51                 | 5    | 10      | 0.96               | 8       | 18   | 0.92                 | 5    | 10      |
|                                                                              | Ruti        | NA                 | 1       | 2    | 0.84                 | 8    | 17      | 0.80               | 6       | 11   | NA                   | 1    | 2       |
|                                                                              | All islands | 0.87               | 13      | 25   | 0.76                 | 18   | 38      | 0.82               | 26      | 52   | 0.83                 | 18   | 34      |
| anal fin<br>spot                                                             | Kissenda    | NA                 | 1       | 4    | NA                   | 1    | 1       | -0.18              | 5       | 10   | 0.82                 | 7    | 14      |
|                                                                              | Python      | 0.99               | 8       | 14   | -0.60                | 4    | 8       | 0.91               | 7       | 12   | 0.72                 | 5    | 10      |
|                                                                              | Makobe      | 0.93               | 10      | 19   | 0.75                 | 5    | 14      | 0.92               | 9       | 19   | 0.91                 | 5    | 10      |
|                                                                              | Ruti        | 0.79               | 11      | 21   | 0.97                 | 8    | 16      | 0.83               | 6       | 14   | NA                   | 1    | 2       |
|                                                                              | All islands | 0.93               | 30      | 58   | 0.83                 | 18   | 39      | 0.83               | 27      | 55   | 0.90                 | 18   | 36      |
| flank                                                                        | Kissenda    | NA                 | 1       | 2    | NA                   | 1    | 1       | 0.88               | 5       | 11   | 0.65                 | 7    | 14      |
|                                                                              | Python      | 0.98               | 9       | 19   | 0.60                 | 5    | 19      | 0.93               | 7       | 16   | 0.98                 | 5    | 10      |
|                                                                              | Makobe      | 0.82               | 10      | 20   | 0.75                 | 5    | 12      | 0.89               | 9       | 21   | -0.54                | 5    | 12      |
|                                                                              | Ruti        | 0.93               | 11      | 21   | 0.91                 | 8    | 16      | 0.83               | 6       | 16   | NA                   | 1    | 2       |
|                                                                              | All islands | 0.96               | 31      | 62   | 0.85                 | 19   | 48      | 0.93               | 27      | 64   | 0.45                 | 18   | 38      |

| Supplementary Table S4: Spearman correlations between body areas for chroma |          |                    |             |    |                      |             |   |                    |      |   |                      |      |   |
|-----------------------------------------------------------------------------|----------|--------------------|-------------|----|----------------------|-------------|---|--------------------|------|---|----------------------|------|---|
|                                                                             |          | light source: lamp |             |    |                      |             |   | light source: sun  |      |   |                      |      |   |
|                                                                             |          | <i>P. nyererei</i> |             |    | <i>P. pundamilia</i> |             |   | <i>P. nyererei</i> |      |   | <i>P. pundamilia</i> |      |   |
|                                                                             |          | rho                | p           | N  | rho                  | p           | N | rho                | p    | N | rho                  | p    | N |
| dorsal fin lappets-anal fin spot                                            | Kissenda | NA                 | NA          | 1  | NA                   | NA          | 1 | -0.10              | 0.95 | 5 | 0.64                 | 0.14 | 7 |
|                                                                             | Python   | 0.50               | 0.22        | 8  | 0.50                 | 1.00        | 3 | -0.07              | 0.91 | 7 | 0.50                 | 0.45 | 5 |
|                                                                             | Makobe   | 0.50               | 1.00        | 3  | -0.14                | 0.80        | 6 | -0.05              | 0.93 | 8 | 0.70                 | 0.23 | 5 |
|                                                                             | Ruti     | NA                 | NA          | 1  | 0.12                 | 0.79        | 8 | 0.54               | 0.30 | 6 | NA                   | NA   | 1 |
| dorsal fin lappets-flank                                                    | Kissenda | NA                 | NA          | 1  | NA                   | NA          | 1 | -0.40              | 0.52 | 5 | -0.68                | 0.11 | 7 |
|                                                                             | Python   | -0.29              | 0.50        | 8  | -0.40                | 0.75        | 4 | -0.32              | 0.50 | 7 | -0.30                | 0.68 | 5 |
|                                                                             | Makobe   | 0.50               | 1.00        | 3  | -0.09                | 0.92        | 6 | -0.26              | 0.54 | 8 | 0.50                 | 0.45 | 5 |
|                                                                             | Ruti     | NA                 | NA          | 1  | -0.17                | 0.70        | 8 | -0.09              | 0.92 | 6 | NA                   | NA   | 1 |
| dorsal fin-dorsal fin lappets                                               | Kissenda | NA                 | NA          | 1  | NA                   | NA          | 1 | -0.90              | 0.08 | 5 | -0.32                | 0.50 | 7 |
|                                                                             | Python   | 0.33               | 0.43        | 8  | -0.80                | 0.33        | 4 | 0.07               | 0.91 | 7 | 0.30                 | 0.68 | 5 |
|                                                                             | Makobe   | -1.00              | 1.00        | 2  | -0.26                | 0.66        | 6 | -0.32              | 0.50 | 7 | 0.20                 | 0.78 | 5 |
|                                                                             | Ruti     | NA                 | NA          | 1  | 0.33                 | 0.43        | 8 | 0.66               | 0.18 | 6 | NA                   | NA   | 1 |
| dorsal fin-dorsum                                                           | Kissenda | NA                 | NA          | 1  | NA                   | NA          | 1 | 0.80               | 0.13 | 5 | 0.00                 | 1.00 | 7 |
|                                                                             | Python   | 0.20               | 0.61        | 9  | -0.20                | 0.92        | 4 | 0.07               | 0.91 | 7 | 0.60                 | 0.35 | 5 |
|                                                                             | Makobe   | 0.52               | 0.20        | 8  | 0.60                 | 0.24        | 6 | -0.25              | 0.59 | 7 | 0.40                 | 0.75 | 4 |
|                                                                             | Ruti     | 0.72               | <b>0.04</b> | 9  | 0.45                 | 0.27        | 8 | 0.26               | 0.66 | 6 | NA                   | NA   | 1 |
| dorsal fin-anal fin spot                                                    | Kissenda | NA                 | NA          | 1  | NA                   | NA          | 1 | 0.00               | 1.00 | 5 | -0.25                | 0.59 | 7 |
|                                                                             | Python   | 0.36               | 0.39        | 8  | -1.00                | 0.33        | 3 | 0.75               | 0.07 | 7 | 0.90                 | 0.08 | 5 |
|                                                                             | Makobe   | -0.65              | 0.07        | 9  | -0.20                | 0.71        | 6 | -0.68              | 0.11 | 7 | -0.30                | 0.68 | 5 |
|                                                                             | Ruti     | 0.36               | 0.27        | 11 | -0.40                | 0.33        | 8 | 0.71               | 0.14 | 6 | NA                   | NA   | 1 |
| dorsal fin-flank                                                            | Kissenda | NA                 | NA          | 1  | NA                   | NA          | 1 | 0.30               | 0.68 | 5 | 0.32                 | 0.50 | 7 |
|                                                                             | Python   | -0.07              | 0.88        | 9  | 0.80                 | 0.33        | 4 | -0.14              | 0.78 | 7 | 0.50                 | 0.45 | 5 |
|                                                                             | Makobe   | 0.22               | 0.58        | 9  | 0.83                 | 0.06        | 6 | 0.04               | 0.96 | 7 | 0.90                 | 0.08 | 5 |
|                                                                             | Ruti     | 0.67               | <b>0.03</b> | 11 | 0.40                 | 0.33        | 8 | -0.09              | 0.92 | 6 | NA                   | NA   | 1 |
| dorsum-dorsal fin lappets                                                   | Kissenda | NA                 | NA          | 1  | NA                   | NA          | 1 | -0.50              | 0.45 | 5 | -0.61                | 0.17 | 7 |
|                                                                             | Python   | 0.14               | 0.75        | 8  | 0.40                 | 0.75        | 4 | -0.61              | 0.17 | 7 | -0.10                | 0.95 | 5 |
|                                                                             | Makobe   | 1.00               | 1.00        | 2  | -0.43                | 0.42        | 6 | 0.19               | 0.66 | 8 | -0.40                | 0.75 | 4 |
|                                                                             | Ruti     | NA                 | NA          | 1  | 0.19                 | 0.66        | 8 | 0.26               | 0.66 | 6 | NA                   | NA   | 1 |
| dorsum-anal fin spot                                                        | Kissenda | NA                 | NA          | 1  | NA                   | NA          | 1 | -0.30              | 0.68 | 5 | -0.61                | 0.17 | 7 |
|                                                                             | Python   | -0.50              | 0.22        | 8  | -0.80                | 0.33        | 4 | -0.07              | 0.91 | 7 | 0.70                 | 0.23 | 5 |
|                                                                             | Makobe   | -0.82              | <b>0.01</b> | 9  | 0.43                 | 0.42        | 6 | -0.35              | 0.36 | 9 | -0.40                | 0.75 | 4 |
|                                                                             | Ruti     | 0.33               | 0.39        | 9  | -0.40                | 0.33        | 8 | -0.09              | 0.92 | 6 | NA                   | NA   | 1 |
| dorsum-flank                                                                | Kissenda | NA                 | NA          | 1  | NA                   | NA          | 1 | 0.30               | 0.68 | 5 | 0.50                 | 0.27 | 7 |
|                                                                             | Python   | 0.20               | 0.61        | 9  | 0.50                 | 0.45        | 5 | 0.43               | 0.35 | 7 | 0.90                 | 0.08 | 5 |
|                                                                             | Makobe   | 0.07               | 0.88        | 9  | 0.20                 | 0.71        | 6 | 0.17               | 0.68 | 9 | -0.20                | 0.92 | 4 |
|                                                                             | Ruti     | 0.27               | 0.49        | 9  | 0.00                 | 1.00        | 8 | 0.77               | 0.10 | 6 | NA                   | NA   | 1 |
| anal fin spot-flank                                                         | Kissenda | NA                 | NA          | 1  | NA                   | NA          | 1 | 0.20               | 0.78 | 5 | -0.57                | 0.20 | 7 |
|                                                                             | Python   | -0.26              | 0.54        | 8  | -1.00                | 0.08        | 4 | 0.14               | 0.78 | 7 | 0.60                 | 0.35 | 5 |
|                                                                             | Makobe   | 0.07               | 0.86        | 10 | -0.66                | 0.18        | 6 | -0.45              | 0.23 | 9 | -0.10                | 0.95 | 5 |
|                                                                             | Ruti     | 0.54               | 0.09        | 11 | -0.86                | <b>0.01</b> | 8 | 0.03               | 1.00 | 6 | NA                   | NA   | 1 |

| Supplementary Table S5: Spearman correlations between body areas for $\lambda P_{50}$ |          |                    |             |    |                      |             |   |                    |      |   |                      |      |   |
|---------------------------------------------------------------------------------------|----------|--------------------|-------------|----|----------------------|-------------|---|--------------------|------|---|----------------------|------|---|
|                                                                                       |          | light source: lamp |             |    |                      |             |   | light source: sun  |      |   |                      |      |   |
|                                                                                       |          | <i>P. nyererei</i> |             |    | <i>P. pundamilia</i> |             |   | <i>P. nyererei</i> |      |   | <i>P. pundamilia</i> |      |   |
|                                                                                       |          | rho                | p           | N  | rho                  | p           | N | rho                | p    | N | rho                  | p    | N |
| dorsal fin lappets-anal fin spot                                                      | Kissenda | NA                 | NA          | 1  | NA                   | NA          | 1 | -0.10              | 0.95 | 5 | 0.63                 | 0.13 | 7 |
|                                                                                       | Python   | 0.36               | 0.39        | 8  | 0.50                 | 1.00        | 3 | -0.07              | 0.91 | 7 | 0.50                 | 0.45 | 5 |
|                                                                                       | Makobe   | 0.87               | 0.33        | 3  | 0.03                 | 1.00        | 6 | -0.06              | 0.89 | 8 | 0.70                 | 0.23 | 5 |
|                                                                                       | Ruti     | NA                 | NA          | 1  | -0.02                | 0.95        | 8 | 0.54               | 0.30 | 6 | NA                   | NA   | 1 |
| dorsal fin lappets-flank                                                              | Kissenda | NA                 | NA          | 1  | NA                   | NA          | 1 | -0.20              | 0.78 | 5 | -0.04                | 0.96 | 7 |
|                                                                                       | Python   | 0.00               | 1.00        | 8  | 0.40                 | 0.75        | 4 | -0.32              | 0.50 | 7 | 0.30                 | 0.68 | 5 |
|                                                                                       | Makobe   | 0.87               | 0.33        | 3  | -0.37                | 0.50        | 6 | -0.24              | 0.57 | 8 | -0.41                | 0.49 | 5 |
|                                                                                       | Ruti     | NA                 | NA          | 1  | -0.61                | 0.11        | 8 | -0.09              | 0.92 | 6 | NA                   | NA   | 1 |
| dorsal fin-dorsal fin edge                                                            | Kissenda | NA                 | NA          | 1  | NA                   | NA          | 1 | -0.70              | 0.23 | 5 | 0.29                 | 0.56 | 7 |
|                                                                                       | Python   | -0.19              | 0.66        | 8  | 0.40                 | 0.75        | 4 | 0.34               | 0.45 | 7 | -0.30                | 0.68 | 5 |
|                                                                                       | Makobe   | -1.00              | 1.00        | 2  | -0.12                | 0.83        | 6 | -0.32              | 0.50 | 7 | 0.40                 | 0.52 | 5 |
|                                                                                       | Ruti     | NA                 | NA          | 1  | -0.30                | 0.47        | 8 | 0.66               | 0.18 | 6 | NA                   | NA   | 1 |
| dorsal fin-dorsum                                                                     | Kissenda | NA                 | NA          | 1  | NA                   | NA          | 1 | 0.90               | 0.08 | 5 | 0.89                 | 0.01 | 7 |
|                                                                                       | Python   | 0.57               | 0.12        | 9  | -0.40                | 0.75        | 4 | -0.27              | 0.56 | 7 | 0.90                 | 0.08 | 5 |
|                                                                                       | Makobe   | 0.48               | 0.24        | 8  | 0.67                 | 0.15        | 6 | -0.25              | 0.59 | 7 | 0.80                 | 0.33 | 4 |
|                                                                                       | Ruti     | 0.67               | <b>0.05</b> | 9  | 0.86                 | 0.01        | 8 | 0.26               | 0.66 | 6 | NA                   | NA   | 1 |
| dorsal fin-anal fin spot                                                              | Kissenda | NA                 | NA          | 1  | NA                   | NA          | 1 | 0.10               | 0.95 | 5 | 0.31                 | 0.50 | 7 |
|                                                                                       | Python   | -0.55              | 0.17        | 8  | 0.50                 | 1.00        | 3 | 0.49               | 0.27 | 7 | -0.90                | 0.08 | 5 |
|                                                                                       | Makobe   | -0.58              | 0.11        | 9  | 0.52                 | 0.29        | 6 | -0.65              | 0.11 | 7 | 0.10                 | 0.95 | 5 |
|                                                                                       | Ruti     | 0.50               | 0.12        | 11 | 0.59                 | 0.13        | 8 | 0.71               | 0.14 | 6 | NA                   | NA   | 1 |
| dorsal fin-flank                                                                      | Kissenda | NA                 | NA          | 1  | NA                   | NA          | 1 | 0.20               | 0.78 | 5 | 0.46                 | 0.30 | 7 |
|                                                                                       | Python   | 0.25               | 0.52        | 9  | 0.60                 | 0.42        | 4 | 0.23               | 0.61 | 7 | 0.50                 | 0.45 | 5 |
|                                                                                       | Makobe   | -0.08              | 0.85        | 9  | 0.90                 | 0.01        | 6 | 0.05               | 0.91 | 7 | 0.41                 | 0.49 | 5 |
|                                                                                       | Ruti     | 0.21               | <b>0.54</b> | 11 | 0.60                 | 0.13        | 8 | -0.09              | 0.92 | 6 | NA                   | NA   | 1 |
| dorsum-dorsal fin lappets                                                             | Kissenda | NA                 | NA          | 1  | NA                   | NA          | 1 | -0.50              | 0.45 | 5 | 0.04                 | 0.96 | 7 |
|                                                                                       | Python   | -0.38              | 0.36        | 8  | -0.40                | 0.75        | 4 | -0.61              | 0.17 | 7 | 0.10                 | 0.95 | 5 |
|                                                                                       | Makobe   | NA                 | NA          | 2  | -0.09                | 0.92        | 6 | 0.24               | 0.57 | 8 | 0.20                 | 0.92 | 4 |
|                                                                                       | Ruti     | NA                 | NA          | 1  | -0.19                | 0.65        | 8 | 0.26               | 0.66 | 6 | NA                   | NA   | 1 |
| dorsum-anal fin spot                                                                  | Kissenda | NA                 | NA          | 1  | NA                   | NA          | 1 | -0.30              | 0.68 | 5 | 0.41                 | 0.36 | 7 |
|                                                                                       | Python   | -0.36              | 0.39        | 8  | 0.40                 | 0.75        | 4 | -0.07              | 0.91 | 7 | -0.70                | 0.23 | 5 |
|                                                                                       | Makobe   | -0.92              | <b>0.00</b> | 9  | -0.20                | 0.71        | 6 | -0.44              | 0.24 | 9 | 0.20                 | 0.92 | 4 |
|                                                                                       | Ruti     | 0.54               | 0.13        | 9  | 0.54                 | 0.17        | 8 | -0.09              | 0.92 | 6 | NA                   | NA   | 1 |
| dorsum-flank                                                                          | Kissenda | NA                 | NA          | 1  | NA                   | NA          | 1 | -0.10              | 0.95 | 5 | 0.71                 | 0.09 | 7 |
|                                                                                       | Python   | 0.67               | 0.06        | 9  | 0.36                 | 0.55        | 5 | 0.43               | 0.35 | 7 | 0.60                 | 0.35 | 5 |
|                                                                                       | Makobe   | 0.11               | 0.78        | 9  | 0.83                 | 0.06        | 6 | -0.03              | 0.93 | 9 | 0.80                 | 0.33 | 4 |
|                                                                                       | Ruti     | 0.10               | 0.80        | 9  | 0.42                 | 0.30        | 8 | 0.77               | 0.10 | 6 | NA                   | NA   | 1 |
| anal fin spot-flank                                                                   | Kissenda | NA                 | NA          | 1  | NA                   | NA          | 1 | 0.50               | 0.45 | 5 | 0.45                 | 0.31 | 7 |
|                                                                                       | Python   | 0.12               | 0.79        | 8  | 0.95                 | 0.05        | 4 | -0.21              | 0.66 | 7 | -0.60                | 0.35 | 5 |
|                                                                                       | Makobe   | 0.41               | 0.24        | 10 | 0.20                 | 0.71        | 6 | -0.36              | 0.34 | 9 | -0.67                | 0.22 | 5 |
|                                                                                       | Ruti     | 0.38               | 0.25        | 11 | 0.12                 | <b>0.78</b> | 8 | 0.03               | 1.00 | 6 | NA                   | NA   | 1 |

| Supplementary Table S6: descriptive statistics for the effect of using different light sources |                      |                    |                           |                             |
|------------------------------------------------------------------------------------------------|----------------------|--------------------|---------------------------|-----------------------------|
| colour metric                                                                                  | species              | body area          | light source              |                             |
|                                                                                                |                      |                    | lamp (mean $\pm$ se, N)   | sunlight (mean $\pm$ se, N) |
| Brightness                                                                                     | <i>P. nyererei</i>   | dorsum             | 646.08 $\pm$ 67.85 (28)   | 2897.22 $\pm$ 402.58 (27)   |
|                                                                                                |                      | dorsal fin         | 1982.62 $\pm$ 157.26 (32) | 6265.16 $\pm$ 759.82 (25)   |
|                                                                                                |                      | dorsal fin lappets | 1141.35 $\pm$ 163.4 (13)  | 5770.37 $\pm$ 920.09 (26)   |
|                                                                                                |                      | anal fin spot      | 2401.1 $\pm$ 159.56 (30)  | 5963.13 $\pm$ 810.37 (27)   |
|                                                                                                |                      | flank              | 1934.79 $\pm$ 150.32 (31) | 5903.28 $\pm$ 685.93 (27)   |
|                                                                                                | <i>P. pundamilia</i> | dorsum             | 642.07 $\pm$ 156.46 (20)  | 2253.07 $\pm$ 359.62 (17)   |
|                                                                                                |                      | dorsal fin         | 1611.3 $\pm$ 142.9 (19)   | 4402.05 $\pm$ 734.25 (18)   |
|                                                                                                |                      | dorsal fin lappets | 767.62 $\pm$ 141.32 (19)  | 4282.96 $\pm$ 933.16 (18)   |
|                                                                                                |                      | anal fin spot      | 1498.26 $\pm$ 134.5 (19)  | 6187.43 $\pm$ 824.95 (18)   |
|                                                                                                |                      | flank              | 1796.6 $\pm$ 222.97 (20)  | 5082.14 $\pm$ 563.47 (18)   |
| Chroma                                                                                         | <i>P. nyererei</i>   | dorsum             | 0.3 $\pm$ 0.03 (28)       | 0.28 $\pm$ 0.03 (27)        |
|                                                                                                |                      | dorsal fin         | 0.4 $\pm$ 0.04 (32)       | 0.24 $\pm$ 0.04 (25)        |
|                                                                                                |                      | dorsal fin lappets | 0.42 $\pm$ 0.04 (13)      | 0.27 $\pm$ 0.03 (26)        |
|                                                                                                |                      | anal fin spot      | 0.33 $\pm$ 0.02 (30)      | 0.15 $\pm$ 0.02 (27)        |
|                                                                                                |                      | flank              | 0.24 $\pm$ 0.02 (31)      | 0.19 $\pm$ 0.02 (27)        |
|                                                                                                | <i>P. pundamilia</i> | dorsum             | 0.11 $\pm$ 0.02 (20)      | 0.09 $\pm$ 0.01 (17)        |
|                                                                                                |                      | dorsal fin         | 0.17 $\pm$ 0.02 (19)      | 0.1 $\pm$ 0.02 (18)         |
|                                                                                                |                      | dorsal fin lappets | 0.38 $\pm$ 0.04 (19)      | 0.2 $\pm$ 0.02 (18)         |
|                                                                                                |                      | anal fin spot      | 0.39 $\pm$ 0.02 (19)      | 0.2 $\pm$ 0.02 (18)         |
|                                                                                                |                      | flank              | 0.17 $\pm$ 0.02 (20)      | 0.07 $\pm$ 0.01 (18)        |
| $\lambda P_{50}$                                                                               | <i>P. nyererei</i>   | dorsum             | 588.29 $\pm$ 8.26 (28)    | 603.37 $\pm$ 5.15 (27)      |
|                                                                                                |                      | dorsal fin         | 596.06 $\pm$ 9.36 (32)    | 591.04 $\pm$ 6.14 (25)      |
|                                                                                                |                      | dorsal fin lappets | 617.62 $\pm$ 4.6 (13)     | 599.65 $\pm$ 4.36 (26)      |
|                                                                                                |                      | anal fin spot      | 605.17 $\pm$ 2.93 (30)    | 577.59 $\pm$ 3.35 (27)      |
|                                                                                                |                      | flank              | 572.19 $\pm$ 3.83 (31)    | 578.52 $\pm$ 3.73 (27)      |
|                                                                                                | <i>P. pundamilia</i> | dorsum             | 536.95 $\pm$ 5.03 (20)    | 553.94 $\pm$ 4.51 (17)      |
|                                                                                                |                      | dorsal fin         | 527.37 $\pm$ 4.24 (19)    | 535.72 $\pm$ 4.69 (18)      |
|                                                                                                |                      | dorsal fin lappets | 613.74 $\pm$ 7.15 (19)    | 589.5 $\pm$ 5.07 (18)       |
|                                                                                                |                      | anal fin spot      | 615.32 $\pm$ 2.59 (19)    | 585.83 $\pm$ 4.33 (18)      |
|                                                                                                |                      | flank              | 531.5 $\pm$ 5.23 (20)     | 544.72 $\pm$ 3.93 (18)      |
